# Supplementary material for: Homemade Nucleic Acid Preservation Buffer Proves Effective in Preserving the Equine Faecal Microbiota over Time at Ambient Temperatures
Source: MDPI journal article supplement (doi:10.3390/ani13193107), 2023-10-05
Supplement: s1 [file s1]

# **Homemade nucleic acid preservation buffer proves effective in preserving the equine faecal microbiota over time at ambient temperatures**

**Ashley B. Ward<sup>1,2\*</sup>, Patricia A. Harris<sup>3</sup>, Caroline M. Argo<sup>1</sup>, Christine Watson<sup>1</sup>, Madalina Neacsu<sup>2</sup>, Wendy R. Russell<sup>2</sup>, Antonio Ribeiro<sup>4</sup>, Elaina Collie-Duguid<sup>4</sup>, Zeynab Heidari<sup>4</sup>, Philippa K. Morrison<sup>1</sup>**

<sup>1</sup> Scotland's Rural College, Aberdeen, UK

<sup>2</sup> University of Aberdeen, The Rowett Institute, Foresterhill, Aberdeen, UK

<sup>3</sup> Equine Studies Group, Waltham Petcare Science Institute, Leicestershire, UK

<sup>4</sup> Centre for Genome-Enabled Biology and Medicine, University of Aberdeen, King's College, Aberdeen, UK  
School of Medicine Medical Sciences and Nutrition, University of Aberdeen, Foresterhill, Aberdeen, UK

\* Correspondence: [Ashley.Ward@sruc.ac.uk](mailto:Ashley.Ward@sruc.ac.uk)

## **DNA Extraction Protocol**

**Reference: Yu Z, Morrison M. 2004. Improved extraction of PCR-quality community DNA from digesta and fecal samples. Biotechniques 36: 808–812**

### **Consumables required**

- (N=X) pre-sterilised 2ml screw cap tubes containing 0.1g 0.5mm and 0.3g of 0.1mm zirconia beads – labelled
- (N=X) fresh sterile 2ml Eppendorf tubes – labelled
- (N=X \* 2) fresh sterile 1.5 ml Eppendorf tubes – labelled
- (N=X) fresh sterile 1.5 ml Eppendorf tubes – labelled
- (N=X) QIAMP DNA collection columns
- (N=X) fresh collection tubes
- (N=X) \* 3 fresh sterile 1.5 ml Eppendorf tubes – labelled for storage
- 1000 ul pipette tips
- 200 ul pipette tips
- 2 ul pipette tips
- 6 tube racks
- Storage boxes

### **Reagents and buffers**

- Lysis buffer (500 uM NaCl, 50mM EDTA, 50 mM Tris-Hcl at pH 8, 4% SDS)
- 10M ammonium acetate
- TE buffer
- DNase free RNase (QIAGEN)
- Proteinase K (QIAGEN)
- Buffer AL (QIAGEN)
- Buffer AW1 (QIAGEN)
- Buffer AW2 (QIAGEN)
- Buffer AE (QIAGEN)

### **Preparation**

1. Heat water bath to 70°C
2. Heat lysis buffer and syringe filter required volume into a beaker. Keep beaker warm.
3. Place ammonium acetate into freezer at -20°C
4. Bring isopropanol to room temperature
5. Place 70% ethanol into freezer at -20 °C

## Method

### Cell lysis

6. Transfer 0.25g of sample into a 2ml screw cap tube containing beads.

*Make up tubes with beads in advance and sterilise in autoclave before using. This will damage some of the caps so need to be careful and replace caps as needed, or use tubes with seals resistant to heat*

7. Add 1 ml lysis buffer

*The SDS in the lysis buffer will come out of solution quite easily. Needs heated to 70°C and then kept quite warm for the next few steps. Beakers containing the lysis buffer can be kept in hot water within another beaker in a bain-marie style.*

*Lysis buffer was filter sterilised before use, due to the high detergent concentration, autoclaving not appropriate*

8. Homogenise for 3 minutes at maximum speed

*We used Disruptor Genie, Scientific Industries, Genie SI-DD38 Digital Disruptor Shaker, 120 VAC*

9. Incubate at 70°C for 15 minutes, with manual shaking every 5 minutes

*In water bath, care must be taken with the lids otherwise the sample will foam up and come out*

10. Centrifuge at 16 000 x g for 5 minutes at 4 °C
11. Transfer 400 ul of the supernatant into a clean 2 ml Eppendorf and store on ice
12. Add 300 ul of lysis buffer to the original sample to repeat the bead beating step
13. Repeat steps 8, 9 and 10.
14. Transfer 100 ul of supernatant **into the Eppendorf – pooling the two samples together and discarding the pelleted matter**

### DNA precipitation

15. Add 260 ul of ice cold 10M ammonium acetate and mix by vortexing briefly

*This is a concentrated salt. DNA precipitates in the presence of 0.5M – 2.5 M salt and alcohol. If you have 500 ul of sample from the previous 2 steps, adding 260ul of 10M will take the concentration down to 3.4M*

*Ammonium acetate releases harmful aerosols when heated, so is filter sterilised, not autoclaved, before use.*

16. Incubate on ice for 5 minutes
17. Centrifuge for 10 minutes at 4°C 16000 x g
18. Transfer the supernatant into 2 fresh 1.5 ml tubes
19. Add 1 volume of room temperature isopropanol and mix well ( inverting the tubes several times)
20. Incubate on ice for 30 minutes.

*The protocol by Yu and Morrison (2004) indicates to incubate on ice, however literature suggests that shorter incubations at room temperature are more appropriate for isopropanol. This should be tested under specific lab conditions.*

21. Centrifuge the samples at 16000 x g for 15 minutes
22. Remove the supernatant by decanting and aspirating

*Some of the samples will not have pelleted depending on the buffer the sample was initially stored in. In this case, remove the obvious supernatant and continue as below.*

23. Add 1 ml of ice cold 70% ethanol and mix well

*The purpose of the 70% ethanol is to remove any contaminating salts, but also ensure that the DNA remains in precipitated form – i.e the pellet. Ensure that you get all sides of the tube covered in ethanol and give a quick pulse on the vortex. If you vortex too vigorously, you risk shearing the DNA. If you don't vortex at all, you risk leaving salts coming through to the next step.*

*There were some difficulties with extracting the DNA from the NAP buffer samples at this stage if the buffer hadn't been fully removed at the initial stages. In those cases, the DNA precipitation step was repeated with 70% ice cold ethanol.*

24. Centrifuge at 16000 xg for 5 minutes , 4°C
25. Repeat steps 22, 23 and 24
26. Repeat step 22
27. Place the tubes under the fume hood for 3 minutes to dry the pellet
28. Add 100 ul of TE buffer to each tube to resuspend the pellet.

*If the pellet does not easily resuspend, heat to 30°C and gently agitate by hand. TE buffer was autoclaved.*

### **DNA purification and isolation**

29. Pool the two samples together in fresh 1.5 ml Eppendorf tubes
30. Add 0.2ul of DNase free RNase
31. Incubate at 37°C for 15 minutes
32. Add 20ul of Proteinase K and 200 ul of Buffer AL
33. Incubate at 70°C for 10 minutes
34. Add 200 ul of 100% ethanol and mix gently
35. Transfer the samples into spin columns
36. Centrifuge at 16000 x g for 1 minute at room temperature
37. Discard flow through
38. Add 500 ul Buffer AW 1 and repeat 36 and 37
39. Add 500 ul Buffer AW2 and repeat 36 and 37
40. Repeat 36
41. Transfer columns into fresh collection tubes
42. Add 200 ul of elution buffer AE
43. Leave at room temperature for 2 minutes
44. Repeat 36
45. Aliquot 50ul of the eluted DNA into 3 fresh 1.5 ml Eppendorf tubes
46. Use 2ul of sample to test DNA yield and purity using DeNovix 11
47. Record sample concentration and purity
48. Store 1 aliquot in a box ready to be labelled and transferred for PCR and sequencing at -20°C
49. Store 2 aliquots in a separate box as duplicates for back up.

## 1. Results

### 3.1. Read depth was most influenced by DNA yield and individual

**Table S1.** Model specification for alpha diversity metric Gamm selection

| Model | Term      |           |                     |       |                 |  |
|-------|-----------|-----------|---------------------|-------|-----------------|--|
|       | treatment | timepoint | treatment*timepoint | group | group*treatment |  |
| 1     | X         | X         | X                   | X     | 0               |  |
| 2     | X         | X         | X                   | 0     | 0               |  |
| 3     | X         | X         | 0                   | X     | 0               |  |
| 4     | X         | 0         | 0                   | X     | 0               |  |
| 5     | 0         | X         | 0                   | X     | 0               |  |
| 6     | X         | X         | 0                   | 0     | 0               |  |
| 7     | X         | 0         | 0                   | 0     | 0               |  |
| 8     | 0         | X         | 0                   | 0     | 0               |  |
| 9     | 0         | 0         | 0                   | X     | 0               |  |
| 10    | X         | X         | 0                   | X     | X               |  |
| 11    | X         | 0         | 0                   | X     | X               |  |

**Table S2.** Faith's PD Gamm selection

|         | K  | LOGLIK    | AICC     | delta_AICC | omega        |
|---------|----|-----------|----------|------------|--------------|
| model1  | 2  | -399.1370 | 804.2740 | 427.91444  | 1.200971e-93 |
| model2  | 26 | -187.1730 | 406.3459 | 29.98633   | 3.079821e-07 |
| model3  | 24 | -200.6898 | 429.3796 | 53.02007   | 3.067696e-12 |
| model4  | 22 | -187.5668 | 399.1335 | 22.77392   | 1.134172e-05 |
| model5  | 21 | -188.0102 | 398.0203 | 21.66077   | 1.978781e-05 |
| model6  | 18 | -191.6094 | 399.2189 | 22.85930   | 1.086776e-05 |
| model7  | 20 | -201.1066 | 422.2132 | 45.85366   | 1.104023e-10 |
| model8  | 19 | -201.4824 | 420.9648 | 44.60521   | 2.060987e-10 |
| model9  | 16 | -205.2129 | 422.4257 | 46.06616   | 9.927373e-11 |
| model10 | 17 | -192.0422 | 398.0844 | 21.72480   | 1.916432e-05 |
| model11 | 29 | -169.1798 | 376.3596 | 0.00000    | 9.999385e-01 |

**Table S3.** Observed diversity Gamm selection

|         | K  | LOGLIK    | AICC     | delta_AICC | omega        |
|---------|----|-----------|----------|------------|--------------|
| model1  | 2  | -398.7398 | 803.4796 | 439.66404  | 3.374145e-96 |
| model2  | 26 | -182.9695 | 397.9390 | 34.12343   | 3.892145e-08 |
| model3  | 24 | -199.5814 | 427.1627 | 63.34713   | 1.755261e-14 |
| model4  | 22 | -183.3618 | 390.7236 | 26.90803   | 1.435467e-06 |
| model5  | 21 | -183.9801 | 389.9601 | 26.14456   | 2.102706e-06 |
| model6  | 18 | -187.2035 | 390.4070 | 26.59147   | 1.681639e-06 |
| model7  | 20 | -199.9863 | 419.9726 | 56.15708   | 6.392076e-13 |
| model8  | 19 | -200.5216 | 419.0431 | 55.22754   | 1.017391e-12 |
| model9  | 16 | -203.6547 | 419.3093 | 55.49374   | 8.906018e-13 |
| model10 | 17 | -187.8125 | 389.6250 | 25.80940   | 2.486319e-06 |

|         |    |           |          |         |              |
|---------|----|-----------|----------|---------|--------------|
| model11 | 29 | -162.9078 | 363.8156 | 0.00000 | 9.999923e-01 |
|---------|----|-----------|----------|---------|--------------|

**Table S4.** Shannon's Diversity Gamm selection

|         | K  | LOGLIK     | AICC     | delta_AICC | omega         |
|---------|----|------------|----------|------------|---------------|
| model1  | 2  | -400.95622 | 807.9124 | 640.42339  | 8.586670e-140 |
| model2  | 26 | -83.96670  | 199.9334 | 32.44434   | 9.011485e-08  |
| model3  | 24 | -99.44630  | 226.8926 | 59.40353   | 1.260908e-13  |
| model4  | 22 | -84.43396  | 192.8679 | 25.37887   | 3.083509e-06  |
| model5  | 21 | -84.86144  | 191.7229 | 24.23381   | 5.466275e-06  |
| model6  | 18 | -94.40430  | 204.8086 | 37.31954   | 7.873378e-09  |
| model7  | 20 | -99.87102  | 219.7420 | 52.25297   | 4.502027e-12  |
| model8  | 19 | -100.26048 | 218.5210 | 51.03190   | 8.290087e-12  |
| model9  | 16 | -109.65383 | 231.3077 | 63.81860   | 1.386640e-14  |
| model10 | 17 | -94.84385  | 203.6877 | 36.19864   | 1.378989e-08  |
| model11 | 29 | -64.74453  | 167.4891 | 0.00000    | 9.999913e-01  |

## Faith's Phylogenetic Diversity

**Table S5:** Parametric coefficients for faiths phylogenetic diversity scaled as predicted by the Group and Treatment factors

|                      | Estimate | Std.Error | T value | Pr(> t )  |
|----------------------|----------|-----------|---------|-----------|
| (Intercept)          | 0.26302  | 0.22891   | 1.149   | 0.25178   |
| Group2               | 0.06475  | 0.31257   | 0.207   | 0.83608   |
| Group1               | -0.78135 | 0.28670   | -2.725  | 0.00693** |
| TreatmentCOLD        | -0.39082 | 0.21761   | -1.796  | 0.07384.  |
| TreatmentCLX         | -0.25564 | 0.21619   | -1.182  | 0.23826   |
| TreatmentNAP         | -0.33083 | 0.21718   | -1.523  | 0.12908   |
| TreatmentFTA         | -0.54425 | 0.22001   | -2.474  | 0.01411*  |
| Group2:TreatmentCOLD | 0.27650  | 0.30659   | 0.902   | 0.36810   |
| Group1:TreatmentCOLD | 0.50534  | 0.30722   | 1.645   | 0.10139   |
| Group2:TreatmentCLX  | 0.47131  | 0.30578   | 1.541   | 0.12463   |
| Group1:TreatmentCLX  | 0.47391  | 0.30610   | 1.548   | 0.12297   |
| Group2:TreatmentNAP  | 0.29934  | 0.30602   | 0.978   | 0.32902   |
| Group1:TreatmentNAP  | 0.38897  | 0.30664   | 1.268   | 0.20593   |
| Group2:TreatmentFTA  | 0.97742  | 0.31028   | 3.150   | 0.00185** |
| Group1:TreatmentFTA  | 0.38768  | 0.31033   | 1.249   | 0.21287   |

Approximate significance of smooth terms:

|                | edf   | Ref.df | F       | p-value      |
|----------------|-------|--------|---------|--------------|
| s(total_reads) | 1.000 | 1      | 617.293 | < 2e-16 ***  |
| s(Pony)        | 6.219 | 8      | 4.486   | 7.85e-06 *** |

R-sq.(adj) = 0.813

Scale est. = 0.17564 n = 248

## Observed Diversity

**Table S6:** Parametric coefficients for observed diversity scaled as predicted by the Group and Treatment factors

|                      | Estimate | Std.Error | tvalue | Pr(> t )  |
|----------------------|----------|-----------|--------|-----------|
| (Intercept)          | 0.2409   | 0.2265    | 1.064  | 0.28864   |
| Group2               | 0.1186   | 0.3093    | 0.384  | 0.70164   |
| Group1               | -0.8069  | 0.2845    | -2.836 | 0.00498** |
| TreatmentCOLD        | -0.3258  | 0.2161    | -1.508 | 0.13297   |
| TreatmentCLX         | -0.2286  | 0.2146    | -1.065 | 0.28798   |
| TreatmentNAP         | -0.2881  | 0.2156    | -1.336 | 0.18282   |
| TreatmentFTA         | -0.5747  | 0.2184    | -2.631 | 0.00910** |
| Group2:TreatmentCOLD | 0.1802   | 0.3044    | 0.592  | 0.55438   |
| Group1:TreatmentCOLD | 0.4751   | 0.3050    | 1.558  | 0.12071   |
| Group2:TreatmentCLX  | 0.4035   | 0.3036    | 1.329  | 0.18509   |
| Group1:TreatmentCLX  | 0.4944   | 0.3039    | 1.627  | 0.10515   |
| Group2:TreatmentNAP  | 0.2436   | 0.3038    | 0.802  | 0.42345   |
| Group1:TreatmentNAP  | 0.4095   | 0.3044    | 1.345  | 0.17995   |
| Group2:TreatmentFTA  | 0.9913   | 0.3081    | 3.218  | 0.00148** |
| Group1:TreatmentFTA  | 0.4643   | 0.3081    | 1.507  | 0.13324   |

Approximate significance of smooth terms:

edf Ref.df F p-value

s(total\_reads) 1.000 1 616.377 < 2e-16 \*\*\*

s(Pony) 6.165 8 4.321 1.21e-05 \*\*\*

R-sq.(adj) = 0.816

Scale est. = 0.17313 n = 248

## Shannon's Diversity

**Table S7:** Parametric coefficients for Shannon's diversity scaled as predicted by the Group and Treatment factors

|             | Estimate | Std.Error | tvalue | Pr(> t ) |
|-------------|----------|-----------|--------|----------|
| (Intercept) | 0.121702 | 0.167097  | 0.728  | 0.46717  |

|                      |           |          |        |           |
|----------------------|-----------|----------|--------|-----------|
| Group2               | 0.375022  | 0.227833 | 1.646  | 0.10116   |
| Group1               | -0.468781 | 0.206379 | -2.271 | 0.02407*  |
| TreatmentCOLD        | -0.147596 | 0.156608 | -0.942 | 0.34698   |
| TreatmentCLX         | -0.161064 | 0.155540 | -1.036 | 0.30155   |
| TreatmentNAP         | -0.149221 | 0.156127 | -0.956 | 0.34022   |
| TreatmentFTA         | -0.460304 | 0.159793 | -2.881 | 0.00436** |
| Group2:TreatmentCOLD | 0.011436  | 0.220514 | 0.052  | 0.95869   |
| Group1:TreatmentCOLD | 0.320381  | 0.220847 | 1.451  | 0.14827   |
| Group2:TreatmentCLX  | 0.064262  | 0.220058 | 0.292  | 0.77054   |
| Group1:TreatmentCLX  | 0.335700  | 0.220371 | 1.523  | 0.12909   |
| Group2:TreatmentNAP  | 0.004866  | 0.219908 | 0.022  | 0.98237   |
| Group1:TreatmentNAP  | 0.263374  | 0.220439 | 1.195  | 0.23345   |
| Group2:TreatmentFTA  | 0.512656  | 0.223719 | 2.292  | 0.02287*  |
| Group1:TreatmentFTA  | 0.213549  | 0.225252 | 0.948  | 0.34413   |

Approximate significance of smooth terms:

edf Ref.df F p-value

s(total\_reads) 3.331 3.331 424.024 < 2e-16 \*\*\*

s(Pony) 6.397 8.000 5.156 1.83e-06 \*\*\*

R-sq.(adj) = 0.904

Scale est. = 0.090643 n = 248

### 3.4 Microbial community was distinct in FTA cards

Table S8. Relative abundance of the dominant taxa averaged across all samples

| Taxonomy         | Relative abundance (%) |
|------------------|------------------------|
| Phylum           |                        |
| Firmicutes       | 61.27                  |
| Bacteroidetes    | 27.02                  |
| Spirochaetes     | 5.15                   |
| Firbobacterota   | 3.97                   |
| Proteobacteria   | 1.00                   |
| Verrucomicrobia  | 0.85                   |
| Actinobacteriota | 0.36                   |



|                   |       |
|-------------------|-------|
| Patescibacteria   | 0.17  |
| Synergistota      | 0.11  |
| Planctomycetota   | 0.04  |
| Chlorflexi        | 0.04  |
| Desulphobacterota | 0.02  |
| Elusimicrobiota   | 0.01  |
| Myxococcota       | <0.01 |

---

Class (Top 20)

|                     |       |
|---------------------|-------|
| Clostridia          | 52.55 |
| Bacteroidia         | 27.02 |
| Bacilli             | 6.42  |
| Spirochaetia        | 5.15  |
| Fibrobacteria       | 3.97  |
| Negativicutes       | 2.30  |
| Gammaproteobacteria | 1.00  |
| Verrucomicrobiae    | 0.78  |
| Coriobacteriia      | 0.32  |
| Saccharimonadia     | 0.19  |
| Syndergista         | 0.11  |
| Lentisphaeria       | 0.07  |
| Alphaproteobacteria | 0.05  |
| Planctomycetes      | 0.04  |
| Actinobacteria      | 0.04  |
| Anaerolineae        | 0.04  |
| Desulfovibrionia    | 0.02  |

Endomicrobia 0.01

Myxococcia <0.01

---

Order (Top 30)

Lachnospirales 29.61

Bacteroidales 27.00

Oscillospirales 17.38

Spirochaetales 5.15

Fibrobacterales 3.97

Erysipelotrichales 2.96

Christensenellales 2.56

Peptostreptococcales-Tissierellales 1.95

Acidaminococcales 1.86

Lactobacillales 1.79

Bacillales 1.30

Verrucomicrobiales 0.78

Clostridiales 0.77

Pseudomonadales 0.61

Veillonellales-Selenomonadales 0.44

Coriobacteriales 0.32

Mycoplasmatales 0.27

Eubacteriales 0.24

Enterobacterales 0.21

Saccharimonadales 0.19

Synergistales 0.11

Burkholderiales 0.09

|                   |      |
|-------------------|------|
| Acholeplasmatales | 0.06 |
| Rickettsiales     | 0.05 |
| Paenibacillales   | 0.04 |
| Pirellulales      | 0.04 |
| Anaerolineales    | 0.04 |
| Oligosphaerales   | 0.04 |
| Micrococcales     | 0.04 |
| Monoglobales      | 0.04 |

---

#### Family (Top 30)

|                                              |      |
|----------------------------------------------|------|
| <i>Oscillospiraceae</i>                      | 8.79 |
| <i>p-251-o5</i>                              | 7.85 |
| <i>Rikenellaceae</i>                         | 5.82 |
| <i>Spirochaetaceae</i>                       | 5.15 |
| <i>Prevotellaceae</i>                        | 5.13 |
| <i>Fibrobacteraceae</i>                      | 3.97 |
| <i>Ruminococcaceae</i>                       | 3.89 |
| <i>Christensenellaceae</i>                   | 2.56 |
| <i>Erysipelatoclostridiaceae</i>             | 2.43 |
| <i>Bacteroidales RF16 group</i>              | 2.31 |
| <i>Anaerovoracaceae</i>                      | 1.94 |
| <i>[Eubacterium] coprostanoligenes group</i> | 1.89 |
| <i>Acidaminococcaceae</i>                    | 1.86 |
| <i>F082</i>                                  | 1.85 |
| <i>Bacteroidales UCG-001</i>                 | 1.49 |
| <i>UCG-010</i>                               | 1.44 |

|                                     |      |
|-------------------------------------|------|
| <i>Bacteroidales BS11 gut group</i> | 1.38 |
| <i>Hungateiclostridiaceae</i>       | 1.35 |
| <i>Streptococcaceae</i>             | 1.32 |
| <i>Planococcaceae</i>               | 1.08 |
| <i>Akkermansiaceae</i>              | 0.78 |
| <i>Clostridiaceae</i>               | 0.77 |
| <i>Paludibacteraceae</i>            | 0.62 |
| <i>Erysipelotrichaceae</i>          | 0.53 |
| <i>Selenomonadaceae</i>             | 0.44 |
| <i>Moraxellaceae</i>                | 0.40 |
| <i>Mycoplasmataceae</i>             | 0.27 |
| <i>Eubacteriaceae</i>               | 0.23 |
| <i>Carnobacteriaceae</i>            | 0.22 |

---

#### Genus

|                                      |       |
|--------------------------------------|-------|
| <i>Lachnospiraceae AC2044 group</i>  | 10.46 |
| <i>Treponema</i>                     | 5.03  |
| <i>Rikenellaceae RC9 gut group</i>   | 4.46  |
| <i>Lachnospiraceae UCG-009</i>       | 4.24  |
| <i>Fibrobacter</i>                   | 3.97  |
| <i>Ruminococcus</i>                  | 3.27  |
| <i>Lachnospiraceae XPB1014 group</i> | 3.26  |
| <i>NK4A214 group</i>                 | 3.25  |
| <i>Christensenellaceae R-7 group</i> | 2.54  |
| <i>UCG-004</i>                       | 2.42  |
| <i>Prevotella</i>                    | 2.16  |

|                                      |      |
|--------------------------------------|------|
| <i>UCG-005</i>                       | 2.06 |
| <i>Phascolarctobacterium</i>         | 1.35 |
| <i>Saccharofermentans</i>            | 1.32 |
| <i>Streptococcus</i>                 | 1.32 |
| <i>UCG-002</i>                       | 1.21 |
| <i>hoa5-07d05 gut group</i>          | 0.90 |
| <i>Prevotellaceae UCG-001</i>        | 0.87 |
| <i>Akkermansia</i>                   | 0.78 |
| <i>Mogibacterium</i>                 | 0.71 |
| <i>Oribacterium</i>                  | 0.69 |
| <i>Clostridium sensu stricto 1</i>   | 0.68 |
| <i>Prevotellaceae UCG-003</i>        | 0.66 |
| <i>Anaerovorax</i>                   | 0.50 |
| <i>Lachnospiraceae NK4A136 group</i> | 0.48 |
| <i>Family XIII AD3011 group</i>      | 0.46 |
| <i>XBB1006</i>                       | 0.46 |
| <i>Alloprevotella</i>                | 0.45 |
| <i>Solibacillus</i>                  | 0.42 |
| <i>Acinetobacter</i>                 | 0.40 |

---

Table 9. Relative abundance of top 10 taxa averaged by treatment at the Phylum, Class, Order, Family and Genus levels.

| Phylum | Taxa              | R. Abund (%) | Taxa                | R. Abund (%) | Taxa                | R. Abund (%) | Taxa                | R. Abund (%) | Taxa              | R. Abund (%) |
|--------|-------------------|--------------|---------------------|--------------|---------------------|--------------|---------------------|--------------|-------------------|--------------|
| Phylum | - 80 REF          |              | COLD                |              | CLX                 |              | NAP                 |              | FTA               |              |
|        | Firmicutes        | 55.90        | Firmicutes          | 58.97        | Firmicutes          | 62.20        | Firmicutes          | 54.77        | Firmicutes        | 75.96        |
|        | Bacteroidota      | 32.31        | Bacteroidota        | 28.09        | Bacteroidota        | 24.58        | Bacteroidota        | 31.62        | Bacteroidota      | 17.55        |
|        | Spirochaetota     | 5.58         | Spirochaetota       | 5.79         | Spirochaetota       | 6.11         | Spirochaetota       | 6.69         | Fibrobacterota    | 2.14         |
|        | Fibrobacterota    | 5.04         | Fibrobacterota      | 3.49         | Fibrobacterota      | 3.39         | Fibrobacterota      | 5.59         | Verrucomicrobiota | 1.35         |
|        | Verrucomicrobiota | 0.65         | Proteobacteria      | 2.28         | Proteobacteria      | 2.23         | Verrucomicrobiota   | 0.70         | Actinobacteriota  | 1.22         |
|        | Patescibacteria   | 0.13         | Verrucomicrobiota   | 0.73         | Verrucomicrobiota   | 0.85         | Proteobacteria      | 0.18         | Spirochaetota     | 1.17         |
|        | Actinobacteriota  | 0.13         | Actinobacteriota    | 0.21         | Patescibacteria     | 0.27         | Patescibacteria     | 0.16         | Synergistota      | 0.17         |
|        | Synergistota      | 0.09         | Patescibacteria     | 0.25         | Actinobacteriota    | 0.18         | Actinobacteriota    | 0.14         | Patescibacteria   | 0.12         |
|        | Planctomycetota   | 0.05         | Synergistota        | 0.11         | Synergistota        | 0.12         | Synergistota        | 0.06         | Chloroflexi       | 0.11         |
| Class  | Proteobacteria    | 0.04         | Planctomycetota     | 0.03         | Chloroflexi         | 0.03         | Planctomycetota     | 0.04         | Planctomycetota   | 0.09         |
|        | Clostridia        | 48.67        | Clostridia          | 45.37        | Clostridia          | 53.04        | Clostridia          | 47.86        | Clostridia        | 69.39        |
|        | Bacteroidia       | 32.31        | Bacteroidia         | 28.09        | Bacteroidia         | 24.58        | Bacteroidia         | 31.62        | Bacteroidia       | 17.55        |
|        | Spirochaetia      | 5.58         | Bacilli             | 11.56        | Bacilli             | 6.42         | Spirochaetia        | 6.69         | Bacilli           | 4.37         |
|        | Bacilli           | 5.06         | Spirochaetia        | 5.79         | Spirochaetia        | 6.11         | Fibrobacteria       | 5.59         | Negativicutes     | 2.20         |
|        | Fibrobacteria     | 5.04         | Fibrobacteria       | 3.49         | Fibrobacteria       | 3.39         | Bacilli             | 4.59         | Fibrobacteria     | 2.14         |
|        | Negativicutes     | 2.17         | Gammaproteobacteria | 2.26         | Negativicutes       | 2.74         | Negativicutes       | 2.31         | Verrucomicrobiae  | 1.29         |
|        | Verrucomicrobiae  | 0.57         | Negativicutes       | 2.04         | Gammaproteobacteria | 2.13         | Verrucomicrobiae    | 0.62         | Coriobacteriia    | 1.22         |
|        | Saccharimonadia   | 0.13         | Verrucomicrobiae    | 0.68         | Verrucomicrobiae    | 0.79         | Saccharimonadia     | 0.16         | Spirochaetia      | 1.17         |
|        | Coriobacteriia    | 0.13         | Saccharimonadia     | 0.25         | Saccharimonadia     | 0.27         | Coriobacteriia      | 0.13         | Synergistia       | 0.17         |
| Order  | Synergistia       | 0.09         | Actinobacteria      | 0.14         | Coriobacteriia      | 0.13         | Gammaproteobacteria | 0.10         | Saccharimonadia   | 0.12         |
|        | Bacteroidales     | 32.31        | Bacteroidales       | 28.07        | Lachnospirales      | 29.66        | Bacteroidales       | 31.60        | Lachnospirales    | 36.22        |
|        | Lachnospirales    | 28.75        | Lachnospirales      | 26.34        | Bacteroidales       | 24.56        | Lachnospirales      | 27.70        | Oscillospirales   | 23.20        |
|        | Oscillospirales   | 16.39        | Oscillospirales     | 13.12        | Oscillospirales     | 17.42        | Oscillospirales     | 17.26        | Bacteroidales     | 17.55        |

|            |                                     |       |                                  |       |                            |       |                                     |       |                                              |       |
|------------|-------------------------------------|-------|----------------------------------|-------|----------------------------|-------|-------------------------------------|-------|----------------------------------------------|-------|
|            | Spirochaetales                      | 5.58  | Spirochaetales                   | 5.79  | Spirochaetales             | 6.11  | Spirochaetales                      | 6.69  | Peptostreptococcales-Tissierellales          | 4.82  |
|            | Fibrobacterales                     | 5.04  | Bacillales                       | 4.97  | Fibrobacterales            | 3.39  | Fibrobacterales                     | 5.59  | Christensenellales                           | 3.78  |
|            | Erysipelotrichales                  | 3.49  | Fibrobacterales                  | 3.49  | Erysipelotrichales         | 2.67  | Erysipelotrichales                  | 2.72  | Erysipelotrichales                           | 2.74  |
|            | Christensenellales                  | 2.06  | Erysipelotrichales               | 3.17  | Christensenellales         | 2.49  | Christensenellales                  | 2.05  | Fibrobacterales                              | 2.14  |
|            | Acidaminococcales                   | 1.88  | Lactobacillales                  | 2.81  | Acidaminococcales          | 2.41  | Acidaminococcales                   | 1.97  | Lactobacillales                              | 1.39  |
|            | Peptostreptococcales-Tissierellales | 1.40  | Christensenellales               | 2.53  | Lactobacillales            | 2.32  | Lactobacillales                     | 1.19  | Verrucomicrobiales                           | 1.29  |
|            | Lactobacillales                     | 1.23  | Clostridiales                    | 1.92  | Clostridiales              | 1.77  | Peptostreptococcales-Tissierellales | 0.79  | Coriobacteriales                             | 1.22  |
| Fa<br>mily | <i>Lachnospiraceae</i>              | 28.74 | <i>Lachnospiraceae</i>           | 26.32 | <i>Lachnospiraceae</i>     | 29.64 | <i>Lachnospiraceae</i>              | 27.66 | <i>Lachnospiraceae</i>                       | 36.21 |
|            | <i>p-251-o5</i>                     | 9.93  | <i>p-251-o5</i>                  | 7.76  | <i>Oscillospiraceae</i>    | 9.40  | <i>p-251-o5</i>                     | 9.72  | <i>Oscillospiraceae</i>                      | 12.23 |
|            | <i>Oscillospiraceae</i>             | 7.67  | <i>Oscillospiraceae</i>          | 7.53  | <i>p-251-o5</i>            | 7.86  | <i>Oscillospiraceae</i>             | 7.42  | <i>Ruminococcaceae</i>                       | 5.70  |
|            | <i>Rikenellaceae</i>                | 6.61  | <i>Rikenellaceae</i>             | 6.66  | <i>Spirochaetaceae</i>     | 6.11  | <i>Spirochaetaceae</i>              | 6.69  | <i>Anaerovoracaceae</i>                      | 4.82  |
|            | <i>Prevotellaceae</i>               | 5.99  | <i>Spirochaetaceae</i>           | 5.79  | <i>Rikenellaceae</i>       | 5.88  | <i>Rikenellaceae</i>                | 6.28  | <i>Prevotellaceae</i>                        | 4.15  |
|            | <i>Spirochaetaceae</i>              | 5.58  | <i>Prevotellaceae</i>            | 4.94  | <i>Prevotellaceae</i>      | 4.22  | <i>Prevotellaceae</i>               | 6.25  | <i>Christensenellaceae</i>                   | 3.78  |
|            | <i>Fibrobacteraceae</i>             | 5.04  | <i>Planococcaceae</i>            | 4.02  | <i>Ruminococcaceae</i>     | 3.70  | <i>Fibrobacteraceae</i>             | 5.59  | <i>p-251-o5</i>                              | 3.55  |
|            | <i>Ruminococcaceae</i>              | 3.77  | <i>Fibrobacteraceae</i>          | 3.49  | <i>Fibrobacteraceae</i>    | 3.39  | <i>Ruminococcaceae</i>              | 4.46  | <i>Rikenellaceae</i>                         | 3.46  |
|            | <i>Erysipelatoclostridiaceae</i>    | 2.95  | <i>Erysipelatoclostridiaceae</i> | 2.71  | <i>Christensenellaceae</i> | 2.49  | <i>Bacteroidales</i>                | 2.64  | <i>[Eubacterium] coprostanoligenes group</i> | 2.48  |
|            | <i>Bacteroidales</i>                | 2.73  | <i>Bacteroidales</i>             | 2.57  | <i>Acidaminococcaceae</i>  | 2.41  | <i>RF16 group</i>                   | 2.34  | <i>Fibrobacteraceae</i>                      | 2.14  |
|            | <i>RF16 group</i>                   |       |                                  |       |                            |       | <i>Erysipelatoclostridiaceae</i>    |       |                                              |       |
|            | <i>Lachnospiraceae</i>              |       | <i>Lachnospiraceae</i>           |       | <i>Lachnospiraceae</i>     |       | <i>Lachnospiraceae</i>              |       | <i>Lachnospiraceae</i>                       |       |
| Ge<br>nus  | <i>AC2044 group</i>                 | 10.81 | <i>AC2044 group</i>              | 8.25  | <i>AC2044 group</i>        | 10.58 | <i>AC2044 group</i>                 | 10.05 | <i>AC2044 group</i>                          | 12.81 |
|            | <i>Treponema</i>                    | 5.46  | <i>Treponema</i>                 | 5.63  | <i>Treponema</i>           | 6.01  | <i>Treponema</i>                    | 6.56  | <i>Lachnospiraceae</i>                       | 7.01  |
|            | <i>Rikenellaceae</i>                |       | <i>Rikenellaceae</i>             |       | <i>Lachnospiraceae</i>     |       |                                     |       |                                              |       |
|            | <i>RC9 gut group</i>                | 5.14  | <i>RC9 gut group</i>             | 5.09  | <i>UCG-009</i>             | 5.02  | <i>Fibrobacter</i>                  | 5.59  | <i>NK4A214 group</i>                         | 5.83  |
|            | <i>Fibrobacter</i>                  | 5.04  | <i>Lachnospiraceae</i>           | 4.82  | <i>Rikenellaceae</i>       | 4.42  | <i>Lachnospiraceae</i>              | 4.98  | <i>Ruminococcus</i>                          | 4.82  |
|            | <i>Lachnospiraceae</i>              |       | <i>UCG-009</i>                   |       | <i>RC9 gut group</i>       |       | <i>UCG-009</i>                      |       | <i>Christensenellaceae</i>                   |       |
|            | <i>UCG-009</i>                      | 4.37  | <i>Fibrobacter</i>               | 3.49  | <i>Fibrobacter</i>         | 3.39  | <i>Rikenellaceae</i>                | 4.63  | <i>R-7 group</i>                             | 3.74  |
|            |                                     |       |                                  |       |                            |       | <i>RC9 gut group</i>                |       |                                              |       |

|                                      |      |                                      |      |                                      |      |                                      |      |                          |      |
|--------------------------------------|------|--------------------------------------|------|--------------------------------------|------|--------------------------------------|------|--------------------------|------|
| <i>Ruminococcus</i>                  | 3.23 | <i>UCG-004</i>                       | 2.71 | <i>Ruminococcus</i>                  | 3.10 | <i>Ruminococcus</i>                  | 3.93 | <i>Mogibacterium</i>     | 2.97 |
| <i>UCG-004</i>                       | 2.94 | <i>NK4A214 group</i>                 | 2.71 | <i>NK4A214 group</i>                 | 3.08 | <i>Prevotella</i>                    | 2.79 | <i>Rikenellaceae RC9</i> | 2.89 |
| <i>Prevotella</i>                    | 2.67 | <i>Christensenellaceae R-7 group</i> | 2.52 | <i>Lachnospiraceae XPB1014 group</i> | 2.82 | <i>Lachnospiraceae XPB1014 group</i> | 2.50 | <i>gut group</i>         | 2.89 |
| <i>NK4A214 group</i>                 | 2.44 | <i>Lachnospiraceae XPB1014 group</i> | 2.36 | <i>UCG-005</i>                       | 2.70 | <i>Prevotella</i>                    | 2.47 | <i>Fibrobacter</i>       | 2.14 |
| <i>Christensenellaceae R-7 group</i> | 2.05 | <i>Prevotella</i>                    | 2.06 | <i>Christensenellaceae R-7 group</i> | 2.49 | <i>UCG-004</i>                       | 2.33 | <i>UCG-004</i>           | 2.12 |
|                                      |      |                                      |      |                                      |      |                                      |      | <i>Lachnospiraceae</i>   |      |
|                                      |      |                                      |      |                                      |      |                                      |      | <i>UCG-009</i>           | 1.80 |



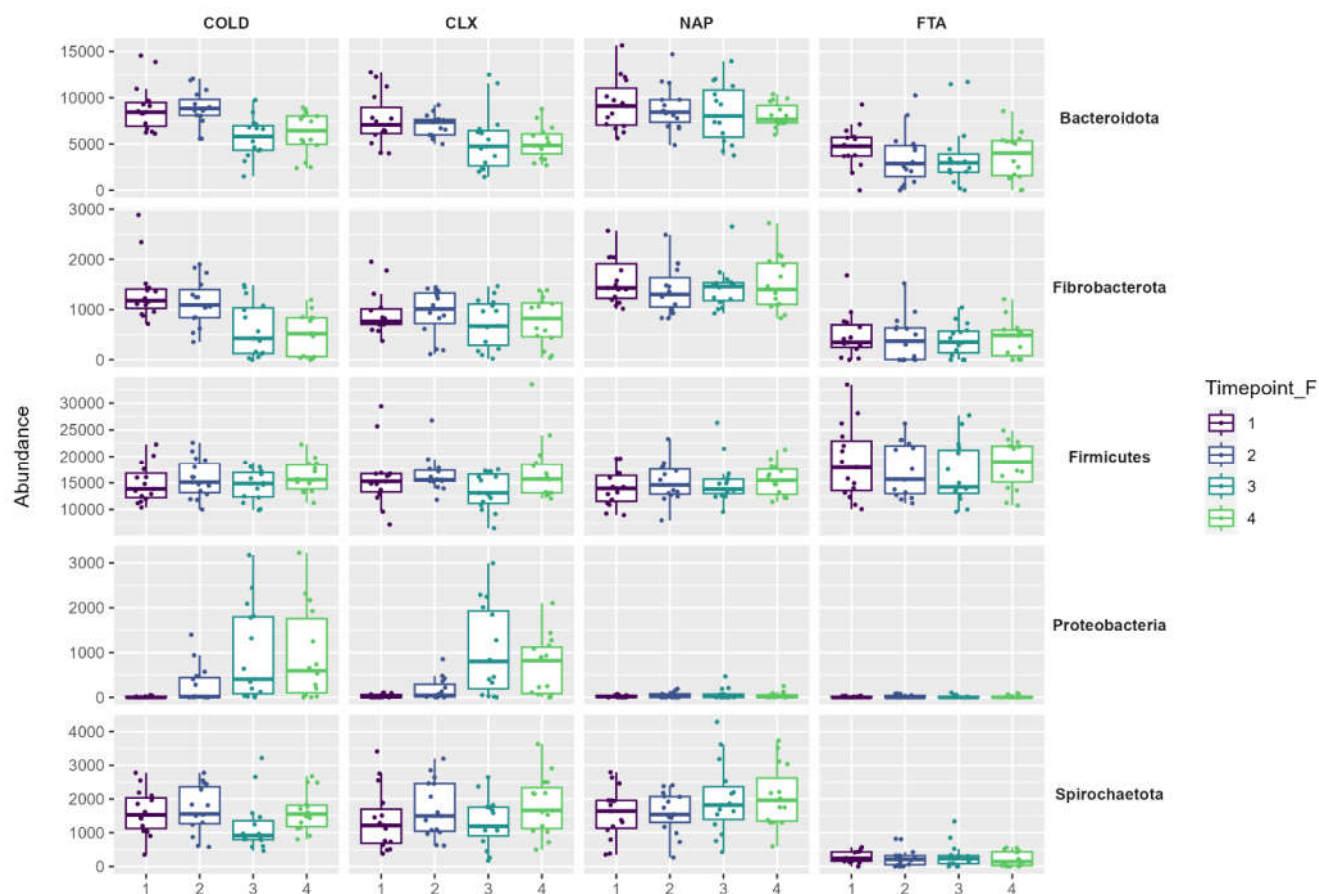

**Supplementary Figure S1.** Raw abundance of the most dominant phyla in equine faecal samples over time at room temperature under different preservation treatments. The X axis shows measurements taken at timepoint 1 (0 hours at room temperature), timepoint 2 (24 hours at room temperature), timepoint 3 (72 hours at room temperature) and timepoint 4 (150 hours at room temperature), and corresponding treatment is indicated in bold at the top of the plot.
